# Supplementary material for: Genetic tools weed out misconceptions of strain reliability in Cannabis sativa: implications for a budding industry
Source: PubMed Central journal article supplement (PMC7815053; doi:10.1186/s42238-019-0001-1), 2019-06-07
Supplement: 42238_2019_1_MOESM2_ESM.pdf [file 42238_2019_1_MOESM2_ESM.pdf]

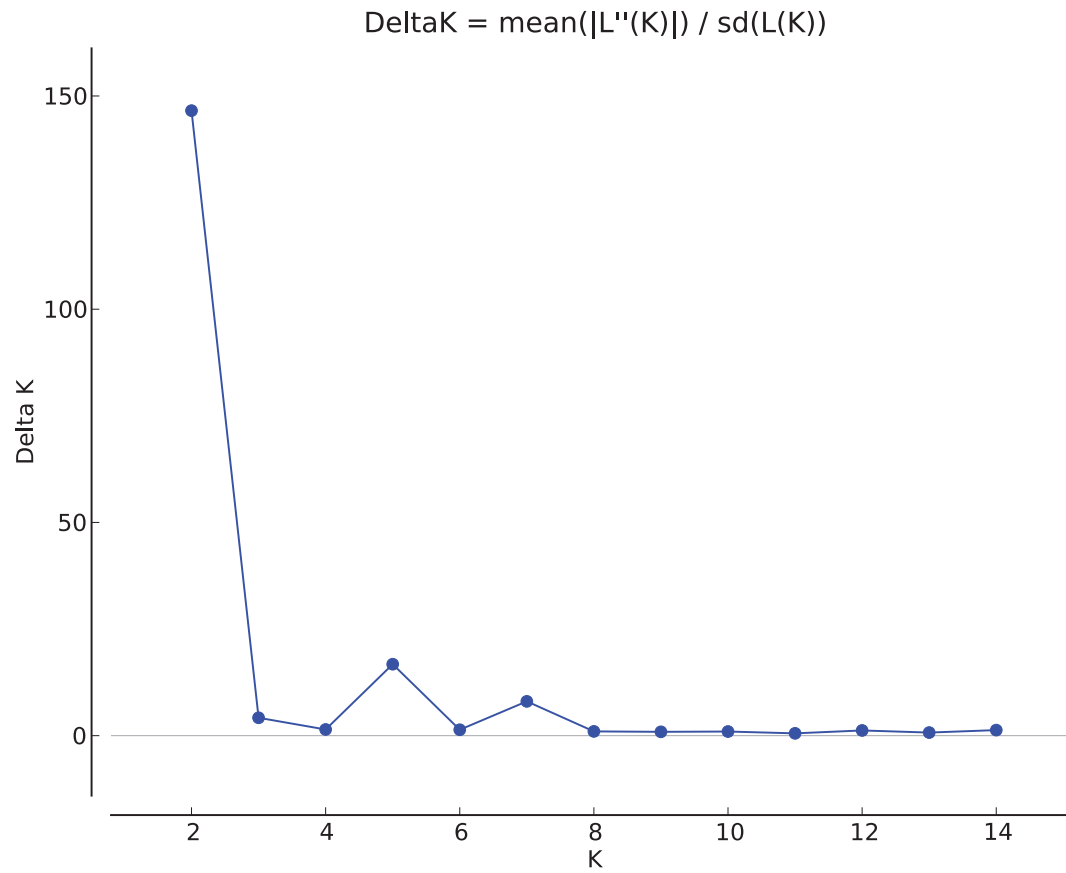

Figure S1.  
STRUCTURE HARVESTER graph indicating K=2 is highly supported ( $\Delta K=146.56$ ) as the number of genetic groups for this data.
