# Supplementary material for: Genetic tools weed out misconceptions of strain reliability in Cannabis sativa: implications for a budding industry
Source: J Cannabis Res. 2019 Jun 7;1:3. doi: 10.1186/s42238-019-0001-1 (PMC7815053; doi:10.1186/s42238-019-0001-1)
Supplement: Supplementary file 1 — Table S1. Twelve popular strains and their described assignment of Sativa and Indica according to six online data bases of Cannabis strain information. Table S2. Primer information includes the multiplex assignment, primer name, microsatellite repeat and number of units repeated in the “Purple Kush” draft genome (National Center for Biotechnology Information, accession AGQN00000000.1), forward and reverse sequences (asterisk denotes the sequence to which the tag is attached), the universal tag (sequence revealed at the bottom of the table), dye (VIC, FAM, PET), optimized annealing temperature, MgCl uL volume,amplified fragment size range, and the number of alleles in the data set. (XLSX 52 kb) [file 42238_2019_1_MOESM1_ESM.xlsx]

## Sheet: Table S1
Table S1. Twelve popular strains and their described assignment of Sativa and Indica according to six online data bases of Cannabis strain information.
Strain	Wikileaf (% sativa)	Leafly	Strainfinder	NCSM	PotGuide	Seedfinder
Durban Poison*	100	Pure sativa	Sativa dominant	Pure Sativa	Sativa	7 breeders: Pure Sativa (4), Mostly Sativa (2), Sativa/Indica (1)
Sour Diesel*	90	Sativa dominant	Sativa dominant (70%)	Mostly Sativa	Sativa Dominant Hybrid	19 breeders: Mostly Sativa (12), Sativa/Indica (5), mostly Indica (2)
Golden Goat*v	65	Sativa dominant hybrid	Not Found	Sativa Dominant	Sativa Dominant Hybrid	3 breeders: Mostly Sativa (2), Sativa/Indica (1)
Bruce Banner*	60	Sativa effects	*Sativa dominant (65%)	Sativa Dominant (60%)	*Sativa Dominant Hybrid	10 breeders: Mostly Sativa (6), Sativa/Indica (1), mostly Indica (3)
Flo*	60	Hybrid	Sativa dominant (60%)	Not Found	Not Found	1 breeder: Mostly Sativa
Pineapple Express*	60	Sativa dominant hybrid	Indica dominant (70%)	Sativa Dominant (60%)	Not Found	6 breeders: Mostly Sativa (2), Sativa/Indica (1), mostly Indica (1), Ruderalis/Sativa/Indica (2)
OG Kush*v	55	Hybrid	Indica dominant (75%)	Not Found	Sativa Dominant Hybrid	25 breeders: Pure Indica(3), mostly Sativa(1), mostly Indica (15), Sativa/Indica (6)
Blue Dream*v	50	Sativa dominant hybrid	Sativa dominant (70%)	Sativa Dominant (60%)	Sativa Dominant Hybrid	10 breeders: Mostly Sativa (9), mostly Indica (1)
Chemdawg*	45	Hybrid	Indica dominant (60%)	Indica dominant (55%)	Sativa Dominant Hybrid	2 breeders: Mostly Sativa (2) (Chem Dog and Chemdawg)
Banana Kush*	40	Hybrid	Not Found	Not Found	Indica Dominant Hybrid	3 breeders: Mostly Indica (1), Sativa/Indica (2)
Girl Scout Cookies*v	40	Hybrid	Indica dominant (60%)	Indica dominant (60%)	Hybrid	17 breeders: Mostly Sativa (2), Sativa/Indica (7), mostly Indica (7), Ruderalis/Sativa/Indica (1)
Purple Kush*v	0	Pure Indica	Indica dominant (75%)	Pure Indica	Indica Dominant Hybrid	5 breeders: Mostly Indica (5)
*Bruce Banner 3 (feminized)

## Sheet: Table S2
Table S2. Primer information includes the multiplex assignment, primer name, microsatellite repeat and number of units repeated in the "Purple Kush" draft genome (National Center for Biotechnology Information, accession AGQN00000000.1), forward and reverse sequences (asterisk denotes the sequence to which the tag is attached), the universal tag (sequence revealed at the bottom of the table), dye …
Multiplex	Primer	Repeat Unit	Forward Sequence	Reverse Sequence	Tag	F/R Tag	Dye	Anneal Temp	Magnesium	Fragment Size	Na
1	Casa_002	(GGAATT)20	GTTAGACAATGCTGCCGGTG	*TTCCGATCCAATCCGCAC	M13		FAM	57.4	MgCl 2uL	270-324	8
1	Casa_022	(AGAT)10	TCCACAGCCAGAGGAGAATC	*GGATCATTGGACAGCCATTC	T7		VIC	63	MgCl 2uL	190-208	6
1	Casa_027	(GTT)20	CATCTCCCAGCCCTTTCATA	*GCTAGGGTTTTTGCCAAC	M13		FAM	57.4	MgCl 2uL	184-196	9
1	Casa_028	(AAT)13	*TGCACATTGCTCTCCTTTTG	GAATGTGGTCCAATAAACACTCC	M13		PET	55.1	MgCl 2uL	173-190	8
1	Casa_030	(CAA)19	CAATCCACACAACAGCTCCT	*TGCAGCAAGTTTAGGTGGTC	M13		VIC	55.1	MgCl 6uL	271-300	8
2	Casa_006	(TTTCTC)30	*TTCTTCTCTCGACAGAACCC	TAGAACCAAGCAAGAAGGGC	M13		FAM	55.1	MgCl 1uL	410-422	6
2	Casa_014	(TAG)13	*ATCGTGTTGCATGTTTGTGG	TGTGCTCCCTCTTGTATGATTC	M13		FAM	63	MgCl 2uL	270-290	8
2	Casa_018	(ATT)28	*TCATAACCCCAAAAGCAAAG	GGGTAAATATAGCTGGCAAAGC	T7		VIC	55.1	MgCl 3uL	182-221	10
2	Casa_026	(CTT)13	*CCATTTCGACCCTTGTAGGT	CTGGGGAAGATGAACGAAAG	M13		FAM	57.4	MgCl 1uL	201-206	9
2	Casa_029	(ACC)11	CCCTCTCAGTCCCAAATTCA	*GATGGTGATGAGGAGGAGGA	M13		PET	55.1	MgCl 2uL	183-192	5
M13: AGGAAACAGCTATGACCAT
T7: GCTAGTTATTGCTCAGCGG
